# Supplementary material for: Triple Stiffness: A Bioinspired Strategy to Combine Load‐Bearing, Durability, and Impact‐Resistance
Source: PubMed Central journal article supplement (PMC8188221; doi:10.1002/advs.202004338), 2021-03-18
Supplement: ADVS-8-2004338-s001.pdf [file ADVS-8-2004338-s001.pdf]

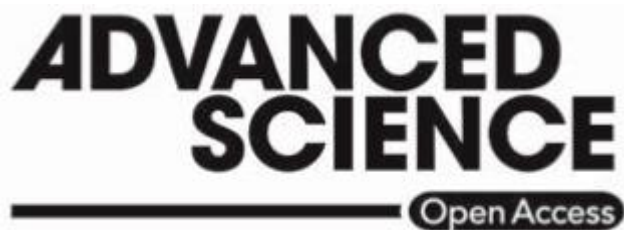

## Supporting Information

for *Adv. Sci.*, DOI: 10.1002/adv.202004338

**Triple stiffness: A bioinspired strategy to combine load-bearing, durability and impact-resistance**

*Ali Khareshi\*, Stanislav Gorb, Hamed Rajabi*

## **Supplementary materials**

**Fig. S1.** An exploded view of the ‘reference model’ to demonstrate the relationship between its key components.

**Fig. S2.** The developed 3D printed models: (A) ‘reference model’, (B) ‘no mechanical stopper model’, (C) ‘no buckling model’, (D) ‘no flexible joint model’.

**Fig. S3.** 3D printed airplane model with ‘triple stiffness’ wings.

**Fig. S4.** 3D printed airplane model with ‘double stiffness’ wings.

**Vid. S1.** A visual representation of the mechanical performance of triple stiffness structure (i.e. ‘reference model’) under loading.

**Vid. S2.** Mechanical performance of the ‘reference model’ vs. ‘no mechanical stopper model’, ‘no buckling model’ and ‘no flexible joint model’ during static, dynamic and fatigue tests, respectively.

**Vid. S3.** Collision and free fall tests of airplane models with ‘triple stiffness’ and ‘double stiffness’ wings.

**Vid. S4.** A summary of the article for the general audience.

(A)

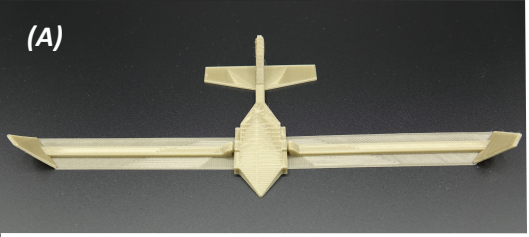

(B)

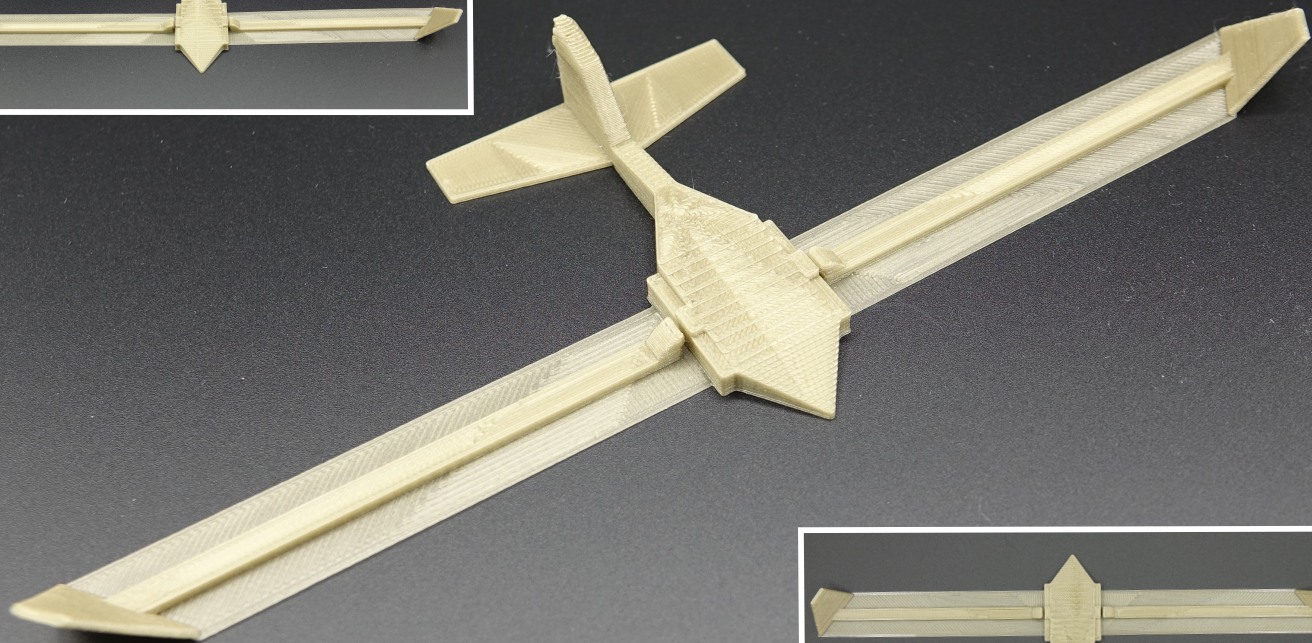

(C)

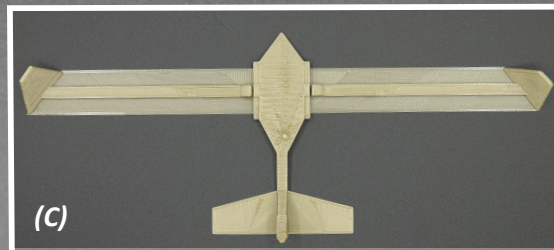

(A)

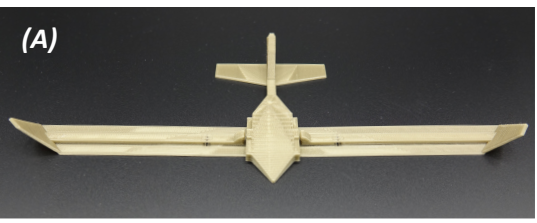

(B)

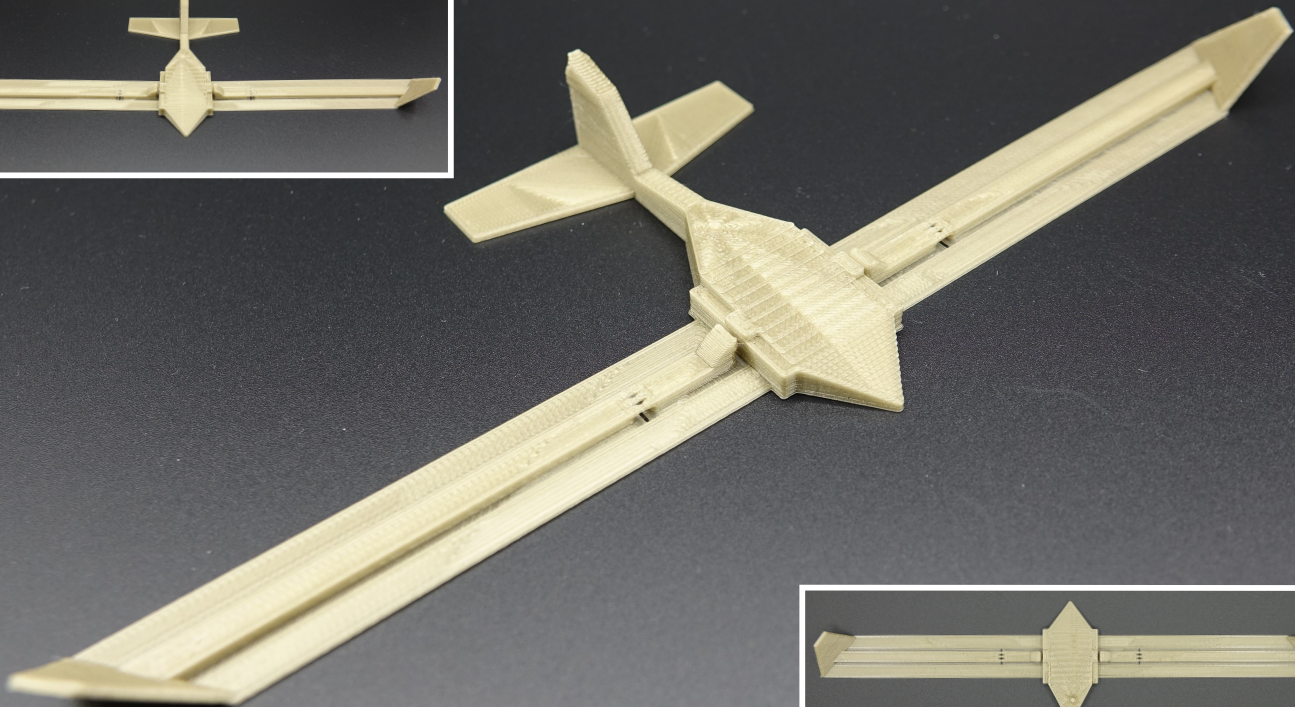

(C)

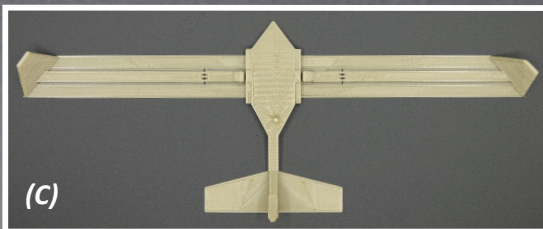

(A) *'reference model'*

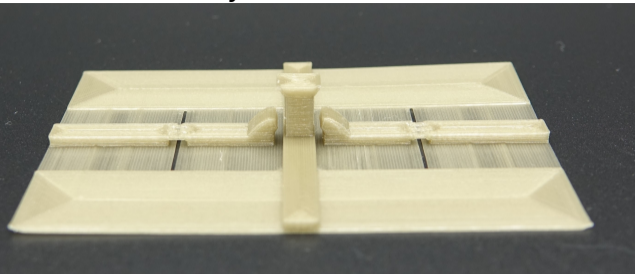

(B) *'no mechanical stopper model'*

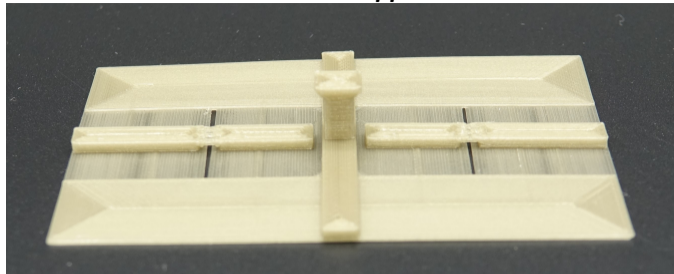

(C) *'no buckling model'*

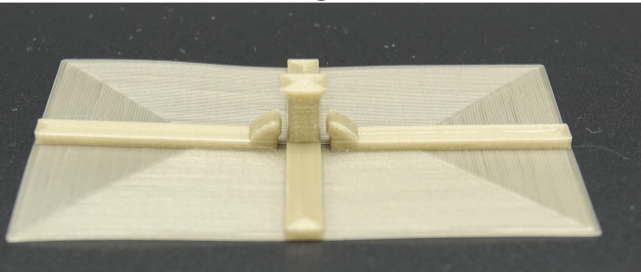

(D) *'no flexible joint model'*

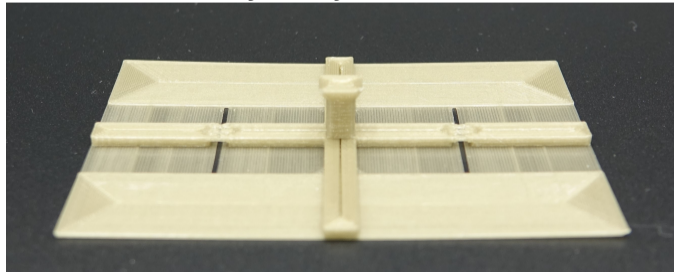

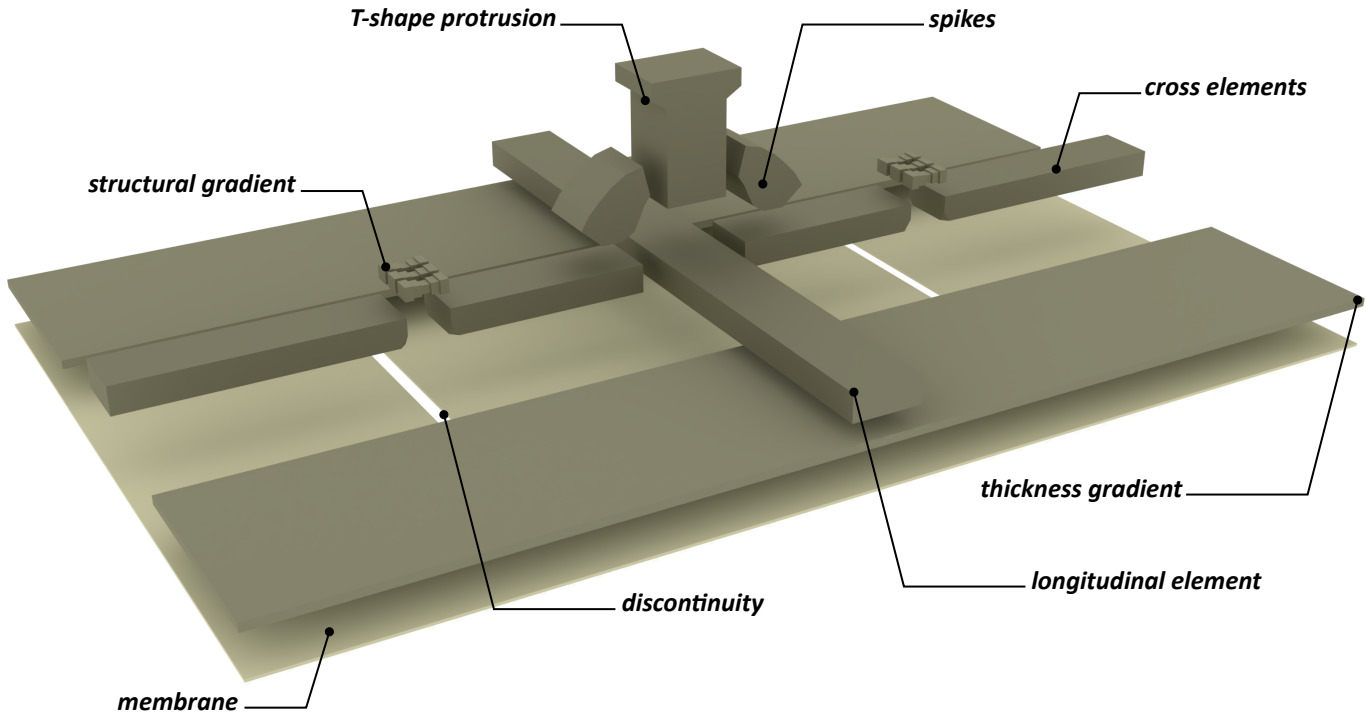

*T-shape protrusion*

*spikes*

*cross elements*

*structural gradient*

*thickness gradient*

*longitudinal element*

*discontinuity*

*membrane*
